# Supplementary material
Source: PubMed Central journal article supplement (PMC6174097)
Supplement: NIHMS951871-supplement-Supp_TableS2.pdf [file NIHMS951871-supplement-Supp_TableS2.pdf]

| Column Name                                   | P-value     | KS Score    |
|-----------------------------------------------|-------------|-------------|
| B_morphMRI_SHOMRI_TotalCartilageScore         | 4.09E-10    | 0.7125      |
| B_compMRI_SHOMRI_Total                        | 2.12E-08    | 0.646428571 |
| B_demographic_Age                             | 2.77E-07    | 0.598214286 |
| B_morphMRI_Coronal_SHOMRI_CartilageLesion.FL  | 3.10E-07    | 0.595535714 |
| B_morphMRI_Coronal_SHOMRI_CartilageLesion.ASL | 3.67E-06    | 0.547321429 |
| B_morphMRI_Coronal_SHOMRI_CartilageLesion.FSL | 3.67E-06    | 0.547321429 |
| B_morphMRI_Coronal_SHOMRI_ligamentumteres     | 6.10E-06    | 0.535714286 |
| B_morphMRI_Sagittal_SHOMRI_CartilageLesion.AA | 1.80E-05    | 0.513392857 |
| B_morphMRI_SHOMRI_MiscTotal                   | 3.51E-05    | 0.498214286 |
| B_morphMRI_Sagittal_SHOMRI_CartilageLesion.FA | 3.85E-05    | 0.496428571 |
| B_morphMRI_Coronal_SHOMRI_CartilageLesion.FSM | 0.000125043 | 0.467857143 |
| B_biomech_KneeKinetics_ExMImp2                | 0.000349274 | 0.458333333 |
| B_morphMRI_SHOMRI_TotalLabrumScore            | 0.000571268 | 0.430357143 |
| B_morphMRI_Coronal_SHOMRI_CartilageLesion.FIM | 0.000619218 | 0.428571429 |
| B_morphMRI_Labrum_SHOMRI_ObliqueAxial.PL      | 0.000920998 | 0.416964286 |
| B_KLScore_ScannedHIP                          | 0.001256214 | 0.417888563 |
| B_morphMRI_Coronal_SHOMRI_SLL                 | 0.001356221 | 0.40625     |
| B_morphMRI_Coronal_SHOMRI_CartilageLesionASM  | 0.001578859 | 0.402678571 |
| B_biomech_KneeKinetics_FlexMImp1              | 0.008635679 | 0.364583333 |
| B_bomech_KneeKinematics_SagExcursion          | 0.008635679 | 0.363541667 |
| B_biomech_KneeKinetics_PeakAddM1              | 0.009223018 | 0.361458333 |
| B_morphMRI_SHOMRI_TotalCystScore              | 0.009223018 | 0.349107143 |
| B_biomech_KneeKinetics_ExMImp1                | 0.009846365 | 0.360416667 |
| B_morphMRI_Labrum_SHOMRI_Sagittal.ASL         | 0.013573266 | 0.336607143 |
| B_biomech_KneeKinetics_PeakFlexM2             | 0.017421443 | 0.339583333 |
| B_biomech_KneeKinetics_PeakFlexM1             | 0.019689815 | 0.335416667 |
| B_morphMRI_SHOMRI_TotalBMEScore               | 0.02091991  | 0.320535714 |
| B_biomech_KneeKinetics_PeakAddM2              | 0.025030636 | 0.327083333 |
| B_boimech_KneeKinetics_PeakExM1               | 0.033485006 | 0.315625    |
| B_compMRI_Femoral_T1p_subcomp6.mean           | 0.035449065 | 0.303308824 |
| B_compMRI_Acetabular_T2_subcomp6.mean         | 0.037513312 | 0.405612245 |
| B_morphMRI_Sagittal_SHOMRI_SubchondralCyst.AA | 0.03968188  | 0.298214286 |
| B_biomech_KneeKinetics_KAM1Imp                | 0.041959012 | 0.307291667 |
| B_biomech_HipKinetics_PeakAdd                 | 0.044349062 | 0.304166667 |
| B_biomech_HipKinetics_AddMImp                 | 0.046856493 | 0.301041667 |
| B_compMRI_Femoral_T2_subcomp5.mean            | 0.046856493 | 0.292279412 |
| B_biomech_HipKinetics_PeakExt                 | 0.049485877 | 0.298958333 |
| B_biomech_KneeKinematics_PeakFlexAngle        | 0.052241889 | 0.297916667 |
| B_biomech_GRF_Peak_vGRF2                      | 0.05512931  | 0.295833333 |
| B_morphMRI_SHOMRI_AlphaAngle                  | 0.061318012 | 1           |
| B_biomech_KneeKinetics_KAM1Imp                | 0.061318012 | 0.291666667 |

|                                                |             |             |
|------------------------------------------------|-------------|-------------|
| B_compMRI_Femoral_T1p_subcomp4.mean            | 0.064629354 | 0.279411765 |
| B_demographic_BMI                              | 0.071711875 | 0.275       |
| B_compMRI_Femoral_T1p_subcomp7.mean            | 0.101897779 | 0.263282732 |
| B_compMRI_Femoral_T1p_subcomp5.mean            | 0.106970102 | 0.259191176 |
| B_KLScore_ContralateralHip                     | 0.112249667 | 0.298534799 |
| B_biomech_HipKinetics_ExtMImp                  | 0.112249667 | 0.263541667 |
| B_shape_mode_20                                | 0.123453809 | 0.274725275 |
| B_biomech_HipKinematics_PeakIRM                | 0.155497818 | 0.25        |
| B_biomech_HipKinematics_PeakAdd                | 0.155497818 | 0.25        |
| B_compMRI_Femoral_T1p_wholecartilage.mean      | 0.16264398  | 0.238970588 |
| B_morphMRI_Labrum_SHOMRI_ObliqueAxial.AL       | 0.16264398  | 0.2375      |
| B_shape_mode_4                                 | 0.170048974 | 0.258241758 |
| B_biomech_KneeKinetics_PeakIRM                 | 0.170048974 | 0.24375     |
| B_morphMRI_Coronal_SHOMRI_BoneMarrowEdema.ASL  | 0.170048974 | 0.235714286 |
| B_PROMs_IPAQ_ss_wdhrs_c                        | 0.170048974 | 0.234821429 |
| B_PROMs_IPAQ_walking_met                       | 0.177718193 | 0.241935484 |
| B_PROMs_Hoos_adl_score                         | 0.185656892 | 0.231431159 |
| B_PROMs_Hoos_womac_function                    | 0.185656892 | 0.231431159 |
| B_biomech_GRF_vGRF2_impulse                    | 0.19387017  | 0.2375      |
| B_compMRI_Acetabular_T2_subcomp4.mean          | 0.19387017  | 0.229779412 |
| B_shape_mode_8                                 | 0.211139916 | 0.247252747 |
| B_biomech_HipKinetics_FlexMImp                 | 0.211139916 | 0.233333333 |
| B_compMRI_Acetabular_T1p_subcomp2.mean         | 0.211139916 | 0.226102941 |
| B_shape_mode_18                                | 0.229564074 | 0.241758242 |
| B_PROMs_PROMIS_physical_raw                    | 0.239219363 | 0.248397436 |
| B_PROMs_PROMIS_physical_se                     | 0.239219363 | 0.248397436 |
| B_PROMs_PROMIS_physical_t                      | 0.239219363 | 0.248397436 |
| B_biomech_HipKinetics_PeakFlexM                | 0.239219363 | 0.227083333 |
| B_compMRI_Femoral_T2_subcomp7.mean             | 0.239219363 | 0.222485769 |
| B_morphMRI_Sagittal_SHOMRI_BoneMarrowEdema.AA  | 0.239219363 | 0.21875     |
| B_shape_mode_5                                 | 0.249174996 | 0.239010989 |
| B_PROMs_ROM_harris_q10a                        | 0.269999672 | 0.23180593  |
| B_compMRI_Femoral_T2_subcomp6.mean             | 0.280873839 | 0.211397059 |
| B_morphMRI_Sagittal_SHOMRI_CartilagelLesion.FP | 0.280873839 | 0.209821429 |
| B_compMRI_Acetabular_T1p_subcomp4.mean         | 0.292058511 | 0.209558824 |
| B_PROMs_Hoos_sympoms_score                     | 0.292058511 | 0.207880435 |
| B_morphMRI_Coronal_SHOMRI_greatertrochanter    | 0.303554983 | 0.222431078 |
| B_biomech_KneeKinetics_FlexMImp2               | 0.303554983 | 0.214583333 |
| patient #                                      | 0.303554983 | 0.204861111 |
| B_PROMs_IPAQ_moderate_met                      | 0.315363956 | 0.209677419 |
| B_biomech_KneeKinematics_PeakInternalRotation  | 0.327485484 | 0.208333333 |
| B_compMRI_Acetabular_T2_subcomp2.mean          | 0.327485484 | 0.202205882 |

|                                               |             |             |
|-----------------------------------------------|-------------|-------------|
| B_compMRI_Acetabular_T1p_subcomp3.mean        | 0.327485484 | 0.202205882 |
| B_demographic_Gender                          | 0.327485484 | 0.201785714 |
| B_biomech_HipKinematics_PeakFlex              | 0.339918919 | 0.207291667 |
| B_demographic_HipSide                         | 0.352662846 | 0.196428571 |
| B_shape_mode_1                                | 0.365715031 | 0.214285714 |
| B_shape_mode_13                               | 0.379072346 | 0.211538462 |
| B_compMRI_Femoral_T2_subcomp2.mean            | 0.379072346 | 0.194852941 |
| B_PROMs_ROM_harris_q10e                       | 0.392730708 | 0.208894879 |
| B_shape_mode_11                               | 0.420929025 | 0.206043956 |
| B_morphMRI_Coronal_SHOMRI_BoneMarrowEdema.ASM | 0.420929025 | 0.1875      |
| B_compMRI_Femoral_T2_subcomp4.mean            | 0.435455382 | 0.185661765 |
| B_compMRI_Femoral_T1p_subcomp3.mean           | 0.450255436 | 0.183823529 |
| B_biomech_HipKinetics_PeakERM                 | 0.46531922  | 0.1875      |
| B_PROMs_PROMIS_rescored07                     | 0.48063536  | 0.203764321 |
| B_shape_mode_16                               | 0.48063536  | 0.195054945 |
| B_biomech_GRF_vGRF1_impulse                   | 0.48063536  | 0.184375    |
| B_demographic_GroupDuringRecruitment          | 0.48063536  | 0.177678571 |
| B_compMRI_Acetabular_T1p_subcomp6.mean        | 0.496190995 | 0.238520408 |
| B_morphMRI_Sagittal_SHOMRI_CartilageLesion.AP | 0.496190995 | 0.175892857 |
| B_PROMs_Hoos_womac_pain                       | 0.511971705 | 0.174365942 |
| B_morphMRI_Coronal_SHOMRI_SubchondralCyst.ASL | 0.511971705 | 0.173214286 |
| B_morphMRI_Coronal_SHOMRI_BoneMarrowEdema.FSM | 0.511971705 | 0.173214286 |
| B_biomech_HipKinematics_PeakSagROM            | 0.576998139 | 0.170833333 |
| B_bomech_KneeKinematics_FlexInitialContact    | 0.576998139 | 0.170833333 |
| B_biomech_HipKinematics_PeakEx                | 0.576998139 | 0.170833333 |
| B_PROMs_IPAQ_ss_mdhrs_c                       | 0.576998139 | 0.166071429 |
| B_bomech_KneeKinematics_PeakExternalRotation  | 0.593628256 | 0.16875     |
| B_PROMs_Hoos_womac_stiffness                  | 0.593628256 | 0.164402174 |
| B_compMRI_Acetabular_T2_subcomp5.mean         | 0.610360271 | 0.161764706 |
| B_biomech_KneeKinematics_SagittalROM          | 0.627167042 | 0.165625    |
| B_shape_mode_19                               | 0.644019457 | 0.173076923 |
| B_PROMs_Hoos_pain_score                       | 0.644019457 | 0.161290323 |
| B_morphMRI_Coronal_SHOMRI_SubchondralCyst.ASM | 0.644019457 | 0.15625     |
| B_shape_mode_2                                | 0.660886439 | 0.17032967  |
| B_shape_mode_3                                | 0.660886439 | 0.17032967  |
| B_PROMs_ROM_harris_q10b                       | 0.660886439 | 0.168463612 |
| B_bomech_KneeKinematics_PeakAbduction         | 0.660886439 | 0.159375    |
| B_compMRI_Femoral_T2_wholecartilage.mean      | 0.677734966 | 0.152573529 |
| B_compMRI_Acetabular_T2_wholecartilage.mean   | 0.677734966 | 0.152573529 |
| B_morphMRI_Coronal_SHOMRI_centeredgeangle     | 0.694530128 | 0.538461538 |
| B_shape_mode_7                                | 0.694530128 | 0.164835165 |
| B_shape_mode_10                               | 0.694530128 | 0.164835165 |

|                                                  |             |             |
|--------------------------------------------------|-------------|-------------|
| B_morphMRI_Axial_SHOMRI_ParalabralCyst           | 0.694530128 | 0.15        |
| B_shape_mode_12                                  | 0.711235195 | 0.162087912 |
| B_morphMRI_Axial_SHOMRI_Effusion                 | 0.744219726 | 0.144642857 |
| B_compMRI_Acetabular_T1p_subcomp5.mean           | 0.760417794 | 0.143382353 |
| B_PROMs_Hoos_qol_score                           | 0.760417794 | 0.142210145 |
| B_morphMRI_Sagittal_SHOMRI_SubchondralCyst.AP    | 0.760417794 | 0.141964286 |
| B_shape_mode_6                                   | 0.77636338  | 0.153846154 |
| B_PROMs_harris_score_total                       | 0.792013032 | 0.150793651 |
| B_biomech_KneeKinetics_PeakERM                   | 0.792013032 | 0.142708333 |
| B_compMRI_Femoral_T1p_subcomp2.mean              | 0.792013032 | 0.137867647 |
| B_PROMs_ROM_harris_q10c                          | 0.807322717 | 0.148247978 |
| B_shape_mode_15                                  | 0.850770995 | 0.142857143 |
| B_biomech_KneeKinetics_PeakExM2                  | 0.864282779 | 0.132291667 |
| B_PROMs_IPAQ_ss_vdhrs_c                          | 0.864282779 | 0.126785714 |
| B_biomech_KneeKinematics_PeakAdduction           | 0.877240341 | 0.130208333 |
| B_PROMs_IPAQ_vigorous_met                        | 0.877240341 | 0.129032258 |
| B_biomech_HipKinematics_PeakERM                  | 0.912423018 | 0.121875    |
| B_biomech_HipKinematics_PeakAbd                  | 0.912423018 | 0.121875    |
| B_compMRI_Acetabular_T1p_wholecartilage.mean     | 0.922816795 | 0.117647059 |
| compositional acetabular                         | 0.932503047 | 0.11603274  |
| B_morphMRI_Axial_SHOMRI_Bump                     | 0.932503047 | 0.114130435 |
| B_compMRI_Femoral_T2_subcomp3.mean               | 0.941465537 | 0.112132353 |
| B_biomech_GRF_linear_loading_rate                | 0.949694307 | 0.114583333 |
| B_morphMRI_Coronal_SHOMRI_acetabularundercoverag | 0.949694307 | 0.110714286 |
| B_biomech_KneeKinematics_PeakExtensionMidstance  | 0.957186197 | 0.1125      |
| B_PROMs_Hoos_sports_score                        | 0.957186197 | 0.108695652 |
| B_PROMs_harris_q10                               | 0.963945244 | 0.106884058 |
| B_biomech_GRF_Peak_vGRF1                         | 0.979977956 | 0.102083333 |
| B_compMRI_Acetabular_T2_subcomp3.mean            | 0.979977956 | 0.099264706 |
| B_shape_mode_9                                   | 0.983995343 | 0.107142857 |
| B_shape_mode_14                                  | 0.990269608 | 0.101648352 |
| B_shape_mode_17                                  | 0.992622715 | 0.098901099 |
| B_PROMs_IPAQ_categorical_score                   | 0.994523714 | 0.089294063 |
| B_morphMRI_Sagittal_SHOMRI_BoneMarrowEdema.FA    | 0.998070641 | 0.082142857 |
| B_PROMs_ROM_harris_q10d                          | 0.998715146 | 0.089447939 |
| B_PROMs_PROMIS_mental_se                         | 0.999697147 | 0.083333333 |
| B_PROMs_PROMIS_mental_raw                        | 0.999697147 | 0.083333333 |
| B_demographic_Ethnicity                          | 0.999990694 | 0.063392857 |
| B_morphMRI_Sagittal_SHOMRI_BoneMarrowEdema.AP    | 0.999990694 | 0.0625      |
| B_morphMRI_Coronal_SHOMRI_BoneMarrowEdema.FL     | 0.999990694 | 0.0625      |
| B_morphMRI_Sagittal_SHOMRI_BoneMarrowEdema.FP    | 0.999990694 | 0.0625      |
| compositional femoral                            | 0.999999973 | 0.053923929 |

|                                                  |             |             |
|--------------------------------------------------|-------------|-------------|
| B_morphMRI_Coronal_SHOMRI_BoneMarrowAdema.FIM    | 0.999999999 | 0.048214286 |
| B_morphMRI_Axial_SHOMRI_AcetabularOvercoverage   | 1           | 0.041213768 |
| B_demographic_Race                               | 1           | 0.039285714 |
| morphological progressor STRONG(2) LOOSE(1)      | 1           | 0.034722222 |
| B_morphMRI_Axial_SHOMRI_LooseBodies              | 1           | 0.033928571 |
| B_morphMRI_Coronal_SHOMRI_BoneMarrowEdema.FSL    | 1           | 0.03125     |
| B_morphMRI_Sagittal_SHOMRI_SubchondralCyst.FA    | 1           | 0.03125     |
| B_morphMRI_Coronal_SHOMRI_insufficiencyfractures | 1           | 0.017241379 |
| B_morphMRI_Sagittal_SHOMRI_SubchondralCyst.FP    | 1           | 0.014285714 |
| B_morphMRI_Axial_SHOMRI_HerniationPit            | 1           | 0.013586957 |
| HOOS progressor (2) vs non (1)                   | 1           | 0.006944444 |
| B_demographic_DominantLeg                        | 1           | 0.00621118  |
| B_PROMs_harris_q9                                | 1           | 1.89E-15    |
| B_morphMRI_Coronal_SHOMRI_SubchondralCyst.FL     | 1           | 1.67E-15    |
| B_morphMRI_Coronal_SHOMRI_SubchondralCyst.FSL    | 1           | 1.67E-15    |
| B_morphMRI_Coronal_SHOMRI_SubchondralCyst.FSM    | 1           | 1.67E-15    |
| B_morphMRI_Coronal_SHOMRI_subchondralcyst.FIM    | 1           | 1.67E-15    |
