# Supplementary material
Source: PubMed Central journal article supplement (PMC6174097)
Supplement: NIHMS951871-supplement-Supp_TableS2b.pdf [file NIHMS951871-supplement-Supp_TableS2b.pdf]

| Column Name                                     | P-value     | KS Score    |
|-------------------------------------------------|-------------|-------------|
| B_biomech_KneeKinetics_PeakFlexM1               | 4.91E-08    | 0.613553114 |
| B_biomech_KneeKinetics_FlexMImp1                | 5.40E-07    | 0.56959707  |
| B_biomech_KneeKinetics_ExMImp2                  | 5.51E-06    | 0.522893773 |
| B_morphMRI_Coronal_SHOMRI_CartilagLesion.FL     | 1.35E-05    | 0.486549708 |
| B_biomech_KneeKinetics_FlexMImp2                | 1.64E-05    | 0.5         |
| B_morphMRI_SHOMRI_TotalCartilageScore           | 5.57E-05    | 0.45497076  |
| B_biomech_KneeKinetics_ExMImp1                  | 6.69E-05    | 0.470695971 |
| B_biomech_KneeKinetics_PeakERM                  | 0.000193187 | 0.445970696 |
| B_biomech_KneeKinematics_PeakFlexAngle          | 0.000485635 | 0.423076923 |
| B_bomech_KneeKinematics_PeakAbduction           | 0.002467246 | 0.379120879 |
| B_bomech_KneeKinematics_FlexInitialContact      | 0.004691266 | 0.358974359 |
| B_morphMRI_Sagittal_SHOMRI_CartilagLesion.AA    | 0.008082509 | 0.330994152 |
| B_boimech_KneeKinetics_PeakExM1                 | 0.009223018 | 0.33974359  |
| B_morphMRI_Sagittal_SHOMRI_CartilagLesion.FA    | 0.009223018 | 0.326315789 |
| B_compMRI_SHOMRI_Total                          | 0.011208835 | 0.320467836 |
| B_bomech_KneeKinematics_SagExcursion            | 0.011952043 | 0.330586081 |
| B_biomech_HipKinematics_PeakFlex                | 0.013573266 | 0.326007326 |
| B_morphMRI_Coronal_SHOMRI_ligamentumteres       | 0.015389755 | 0.30994152  |
| B_compMRI_Femoral_T1p_subcomp6.mean             | 0.019689815 | 0.305194805 |
| B_biomech_GRF_Peak_vGRF1                        | 0.02091991  | 0.313186813 |
| B_morphMRI_Coronal_SHOMRI_CartilagLesion.ASL    | 0.02091991  | 0.300584795 |
| B_morphMRI_Coronal_SHOMRI_CartilagLesion.FSL    | 0.02091991  | 0.300584795 |
| B_morphMRI_Coronal_SHOMRI_CartilagLesionASM     | 0.02091991  | 0.299415205 |
| B_biomech_KneeKinetics_PeakAddM2                | 0.025030636 | 0.305860806 |
| B_compMRI_Femoral_T2_subcomp7.mean              | 0.026551868 | 0.297757475 |
| B_morphMRI_Coronal_SHOMRI_CartilagLesion.FSM    | 0.026551868 | 0.29122807  |
| B_biomech_KneeKinematics_PeakExtensionMidstance | 0.044349062 | 0.284798535 |
| B_compMRI_Acetabular_T1p_wholecartilage.mean    | 0.046856493 | 0.275974026 |
| B_biomech_KneeKinematics_PeakAdduction          | 0.049485877 | 0.281135531 |
| B_morphMRI_Coronal_SHOMRI_CartilagLesion.FIM    | 0.052241889 | 0.267836257 |
| B_demographic_BMI                               | 0.05512931  | 0.265497076 |
| B_compMRI_Femoral_T1p_subcomp7.mean             | 0.058153024 | 0.268687708 |
| B_biomech_KneeKinematics_SagittalROM            | 0.064629354 | 0.27014652  |
| B_biomech_HipKinematics_PeakAdd                 | 0.071711875 | 0.267399267 |
| B_biomech_HipKinematics_PeakIRM                 | 0.071711875 | 0.267399267 |
| B_biomech_KneeKinetics_PeakExM2                 | 0.071711875 | 0.266483516 |
| B_biomech_KneeKinetics_PeakAddM1                | 0.075493659 | 0.264652015 |
| B_PROMs_ROM_harris_q10e                         | 0.092351687 | 0.276412776 |
| B_compMRI_Acetabular_T2_subcomp6.mean           | 0.097026898 | 0.308966862 |
| B_biomech_KneeKinetics_KAM1Imp                  | 0.097026898 | 0.253663004 |
| B_morphMRI_Sagittal_SHOMRI_SubchondralCyst.AA   | 0.097026898 | 0.244444444 |

|                                               |             |             |
|-----------------------------------------------|-------------|-------------|
| B_biomech_KneeKinetics_KAM1Imp                | 0.106970102 | 0.249084249 |
| B_demographic_Age                             | 0.123453809 | 0.235087719 |
| B_biomech_HipKinetics_PeakFlexM               | 0.129390042 | 0.242673993 |
| B_morphMRI_SHOMRI_MiscTotal                   | 0.129390042 | 0.231578947 |
| B_biomech_HipKinematics_PeakSagROM            | 0.148604982 | 0.235347985 |
| B_morphMRI_SHOMRI_TotalBMEScore               | 0.155497818 | 0.223391813 |
| B_biomech_KneeKinetics_PeakIRM                | 0.16264398  | 0.230769231 |
| B_morphMRI_SHOMRI_AlphaAngle                  | 0.170048974 | 0.571428571 |
| B_shape_mode_15                               | 0.170048974 | 0.248900063 |
| B_compMRI_Femoral_T1p_subcomp4.mean           | 0.170048974 | 0.222402597 |
| B_morphMRI_SHOMRI_TotalCystScore              | 0.177718193 | 0.21871345  |
| B_compMRI_Acetabular_T1p_subcomp2.mean        | 0.185656892 | 0.219155844 |
| B_shape_mode_13                               | 0.19387017  | 0.240729101 |
| B_biomech_HipKinetics_PeakExt                 | 0.19387017  | 0.222527473 |
| B_shape_mode_18                               | 0.202362942 | 0.238214959 |
| B_compMRI_Acetabular_T1p_subcomp6.mean        | 0.211139916 | 0.266081871 |
| B_shape_mode_20                               | 0.211139916 | 0.237586424 |
| B_biomech_GRF_linear_loading_rate             | 0.220205559 | 0.217032967 |
| B_shape_mode_10                               | 0.229564074 | 0.233186675 |
| B_biomech_HipKinematics_PeakEx                | 0.229564074 | 0.215201465 |
| B_compMRI_Acetabular_T2_wholecartilage.mean   | 0.229564074 | 0.207792208 |
| B_biomech_GRF_vGRF1_impulse                   | 0.249174996 | 0.210622711 |
| B_morphMRI_Coronal_SHOMRI_BoneMarrowEdema.ASL | 0.259434169 | 0.2         |
| B_biomech_HipKinetics_ExtMImp                 | 0.280873839 | 0.205128205 |
| B_compMRI_Acetabular_T1p_subcomp5.mean        | 0.292058511 | 0.196428571 |
| B_morphMRI_Sagittal_SHOMRI_CartilageLesion.FP | 0.303554983 | 0.191812865 |
| B_shape_mode_2                                | 0.315363956 | 0.213702074 |
| B_morphMRI_Labrum_SHOMRI_Sagittal.ASL         | 0.339918919 | 0.185964912 |
| B_compMRI_Acetabular_T2_subcomp5.mean         | 0.392730708 | 0.180194805 |
| B_compMRI_Acetabular_T1p_subcomp3.mean        | 0.392730708 | 0.180194805 |
| B_compMRI_Acetabular_T2_subcomp2.mean         | 0.420929025 | 0.176948052 |
| B_shape_mode_5                                | 0.435455382 | 0.194846009 |
| B_PROMs_ROM_harris_q10b                       | 0.435455382 | 0.192260442 |
| B_shape_mode_14                               | 0.450255436 | 0.192331867 |
| B_KLScore_ScannedHIP                          | 0.450255436 | 0.174528302 |
| B_compMRI_Femoral_T1p_wholecartilage.mean     | 0.46531922  | 0.170454545 |
| B_biomech_HipKinetics_PeakAdd                 | 0.48063536  | 0.173076923 |
| B_morphMRI_Coronal_SHOMRI_centeredgeangle     | 0.496190995 | 0.428571429 |
| B_KLScore_ContralateralHip                    | 0.511971705 | 0.198938992 |
| B_PROMs_PROMIS_mental_raw                     | 0.511971705 | 0.191964286 |
| B_compMRI_Femoral_T2_subcomp2.mean            | 0.511971705 | 0.163961039 |
| B_compMRI_Femoral_T1p_subcomp2.mean           | 0.511971705 | 0.163961039 |

|                                               |             |             |
|-----------------------------------------------|-------------|-------------|
| B_compMRI_Acetabular_T2_subcomp4.mean         | 0.511971705 | 0.163961039 |
| B_shape_mode_12                               | 0.560495104 | 0.175989943 |
| B_bomech_KneeKinematics_PeakExternalRotation  | 0.560495104 | 0.162087912 |
| B_compMRI_Acetabular_T2_subcomp3.mean         | 0.560495104 | 0.159090909 |
| B_morphMRI_Sagittal_SHOMRI_BoneMarrowEdema.AA | 0.560495104 | 0.155555556 |
| B_PROMs_ROM_harris_q10a                       | 0.593628256 | 0.170761671 |
| B_PROMs_harris_score_total                    | 0.593628256 | 0.169369369 |
| B_biomech_HipKinematics_PeakAbd               | 0.593628256 | 0.158424908 |
| B_biomech_HipKinematics_PeakERM               | 0.593628256 | 0.158424908 |
| B_morphMRI_SHOMRI_TotalLabrumScore            | 0.593628256 | 0.152046784 |
| B_shape_mode_3                                | 0.610360271 | 0.168447517 |
| B_PROMs_IPAQ_moderate_met                     | 0.627167042 | 0.155462185 |
| B_compMRI_Femoral_T2_subcomp5.mean            | 0.627167042 | 0.149350649 |
| B_compMRI_Femoral_T2_subcomp4.mean            | 0.627167042 | 0.149350649 |
| B_shape_mode_6                                | 0.694530128 | 0.159019485 |
| B_compMRI_Femoral_T2_subcomp6.mean            | 0.711235195 | 0.13961039  |
| B_morphMRI_Coronal_SHOMRI_SLL                 | 0.711235195 | 0.139181287 |
| B_compMRI_Femoral_T1p_subcomp3.mean           | 0.744219726 | 0.136363636 |
| B_morphMRI_Labrum_SHOMRI_ObliqueAxial.AL      | 0.760417794 | 0.133333333 |
| B_morphMRI_Coronal_SHOMRI_BoneMarrowEdema.ASM | 0.760417794 | 0.133333333 |
| B_shape_mode_16                               | 0.77636338  | 0.147705845 |
| B_biomech_KneeKinematics_PeakInternalRotation | 0.792013032 | 0.134615385 |
| B_shape_mode_1                                | 0.807322717 | 0.14142049  |
| B_biomech_GRF_Peak_vGRF2                      | 0.82224819  | 0.129120879 |
| B_compMRI_Femoral_T2_subcomp3.mean            | 0.82224819  | 0.126623377 |
| patient #                                     | 0.82224819  | 0.122433744 |
| B_PROMs_ROM_harris_q10d                       | 0.836745406 | 0.138888889 |
| B_shape_mode_11                               | 0.836745406 | 0.138277813 |
| B_PROMs_IPAQ_vigorous_met                     | 0.836745406 | 0.128851541 |
| B_biomech_GRF_vGRF2_impulse                   | 0.836745406 | 0.127289377 |
| compositional femoral                         | 0.836745406 | 0.125       |
| B_PROMs_Hoos_womac_function                   | 0.836745406 | 0.123412698 |
| B_PROMs_Hoos_adl_score                        | 0.836745406 | 0.123412698 |
| B_shape_mode_8                                | 0.850770995 | 0.136392206 |
| B_biomech_HipKinetics_PeakERM                 | 0.850770995 | 0.126373626 |
| B_shape_mode_19                               | 0.864282779 | 0.133878064 |
| B_compMRI_Acetabular_T1p_subcomp4.mean        | 0.864282779 | 0.12012987  |
| B_morphMRI_Labrum_SHOMRI_ObliqueAxial.PL      | 0.864282779 | 0.118128655 |
| B_demographic_HipSide                         | 0.877240341 | 0.116959064 |
| B_morphMRI_Coronal_SHOMRI_SubchondralCyst.ASL | 0.877240341 | 0.115789474 |
| B_PROMs_IPAQ_categorical_score                | 0.889605638 | 0.11525974  |
| B_shape_mode_7                                | 0.901343642 | 0.125707102 |

|                                                  |             |             |
|--------------------------------------------------|-------------|-------------|
| B_biomech_KneeKinetics_PeakFlexM2                | 0.901343642 | 0.118131868 |
| B_shape_mode_17                                  | 0.912423018 | 0.125078567 |
| B_morphMRI_Coronal_SHOMRI_SubchondralCyst.ASM    | 0.912423018 | 0.111111111 |
| B_shape_mode_9                                   | 0.922816795 | 0.121935889 |
| B_biomech_HipKinetics_FlexMImp                   | 0.922816795 | 0.113553114 |
| B_PROMs_Hoos_pain_score                          | 0.922816795 | 0.113445378 |
| B_biomech_HipKinetics_AddMImp                    | 0.932503047 | 0.111721612 |
| B_compMRI_Femoral_T2_wholecartilage.mean         | 0.932503047 | 0.108766234 |
| B_compMRI_Femoral_T1p_subcomp5.mean              | 0.932503047 | 0.107142857 |
| B_PROMs_PROMIS_physical_raw                      | 0.941465537 | 0.12202381  |
| B_PROMs_PROMIS_physical_t                        | 0.941465537 | 0.12202381  |
| B_PROMs_PROMIS_physical_se                       | 0.941465537 | 0.12202381  |
| compositional acetabular                         | 0.941465537 | 0.107142857 |
| B_morphMRI_Sagittal_SHOMRI_CartilagelLesion.AP   | 0.949694307 | 0.102923977 |
| B_PROMs_Hoos_sympoms_score                       | 0.957186197 | 0.100396825 |
| B_PROMs_ROM_harris_q10c                          | 0.963945244 | 0.10995086  |
| B_PROMs_IPAQ_walking_met                         | 0.963945244 | 0.102240896 |
| B_PROMs_Hoos_sports_score                        | 0.963945244 | 0.099206349 |
| B_shape_mode_4                                   | 0.969982946 | 0.108108108 |
| B_morphMRI_Sagittal_SHOMRI_SubchondralCyst.AP    | 0.979977956 | 0.093567251 |
| B_PROMs_Hoos_womac_pain                          | 0.992622715 | 0.084920635 |
| B_PROMs_Hoos_womac_stiffness                     | 0.996028258 | 0.081746032 |
| B_morphMRI_Axial_SHOMRI_Effusion                 | 0.996028258 | 0.080701754 |
| morphological progressor STRONG(2) LOOSE(1)      | 0.996028258 | 0.080253826 |
| B_demographic_DominantLeg                        | 0.997192327 | 0.105263158 |
| B_morphMRI_Coronal_SHOMRI_BoneMarrowEdema.FSM    | 0.998070641 | 0.076023392 |
| B_morphMRI_Sagittal_SHOMRI_BoneMarrowEdema.FA    | 0.998070641 | 0.076023392 |
| B_PROMs_IPAQ_ss_wdhrs_c                          | 0.999173657 | 0.07251462  |
| B_morphMRI_Coronal_SHOMRI_acetabularundercoverag | 0.999488777 | 0.071345029 |
| HOOS progressor (2) vs non (1)                   | 0.99995412  | 0.061590146 |
| B_PROMs_IPAQ_ss_vdhrs_c                          | 0.99999632  | 0.057309942 |
| B_PROMs_PROMIS_rescored07                        | 0.999998688 | 0.06554878  |
| B_demographic_Gender                             | 0.999999886 | 0.051461988 |
| B_demographic_Race                               | 0.999999995 | 0.046783626 |
| B_demographic_Ethnicity                          | 0.999999995 | 0.046783626 |
| B_PROMs_PROMIS_mental_se                         | 0.999999999 | 0.052083333 |
| B_morphMRI_Sagittal_SHOMRI_BoneMarrowEdema.AP    | 0.999999999 | 0.044444444 |
| B_morphMRI_Coronal_SHOMRI_BoneMarrowEdema.FL     | 0.999999999 | 0.044444444 |
| B_morphMRI_Sagittal_SHOMRI_BoneMarrowEdema.FP    | 0.999999999 | 0.044444444 |
| B_PROMs_Hoos_qol_score                           | 1           | 0.042460317 |
| B_PROMs_harris_q10                               | 1           | 0.037480064 |
| B_demographic_GroupDuringRecruitment             | 1           | 0.037426901 |

|                                                  |   |             |
|--------------------------------------------------|---|-------------|
| B_morphMRI_Coronal_SHOMRI_greatertrochanter      | 1 | 0.038888889 |
| B_morphMRI_Sagittal_SHOMRI_SubchondralCyst.FA    | 1 | 0.035087719 |
| B_PROMs_IPAQ_ss_mdhrs_c                          | 1 | 0.031578947 |
| B_morphMRI_Axial_SHOMRI_AcetabularOvercoverage   | 1 | 0.026984127 |
| B_morphMRI_Coronal_SHOMRI_BoneMarrowAdema.FIM    | 1 | 0.026900585 |
| B_morphMRI_Coronal_SHOMRI_BoneMarrowEdema.FSL    | 1 | 0.022222222 |
| B_morphMRI_Coronal_SHOMRI_insufficiencyfractures | 1 | 0.02173913  |
| B_morphMRI_Sagittal_SHOMRI_SubchondralCyst.FP    | 1 | 0.01754386  |
| B_morphMRI_Axial_SHOMRI_ParalabralCyst           | 1 | 0.015204678 |
| B_morphMRI_Axial_SHOMRI_Bump                     | 1 | 0.01468254  |
| B_morphMRI_Axial_SHOMRI_LooseBodies              | 1 | 0.009356725 |
| B_morphMRI_Axial_SHOMRI_HerniationPit            | 1 | 0.000793651 |
| B_PROMs_harris_q9                                | 1 | 1.22E-15    |
| B_morphMRI_Coronal_SHOMRI_subchondralcyst.FIM    | 1 | 1.11E-15    |
| B_morphMRI_Coronal_SHOMRI_SubchondralCyst.FSL    | 1 | 1.11E-15    |
| B_morphMRI_Coronal_SHOMRI_SubchondralCyst.FSM    | 1 | 1.11E-15    |
| B_morphMRI_Coronal_SHOMRI_SubchondralCyst.FL     | 1 | 1.11E-15    |
